# Supplementary material for: Circular DDX10 is associated with ovarian function and assisted reproductive technology outcomes through modulating the proliferation and steroidogenesis of granulosa cells
Source: publisher site journal article supplement (doi:10.18632/aging.202699), 2021-03-19
Supplement: Supplementary file [file aging-v13i7-202699-supplementary-material-SD2.pdf]

## SUPPLEMENTARY TABLES

**Supplementary Table 1. Detail information of *circDDX10* in the gene bank.**

| <b>Name</b>         | <b><i>circDDX10</i></b>                                        |
|---------------------|----------------------------------------------------------------|
| Transcript ID       | hsa_circRNA_0024246                                            |
| Position            | chr11:108559663-108577564 (+)                                  |
| Best transcript     | NM_004398                                                      |
| Gene Symbol         | DEAD-box helicase 10 ( <i>DDX10</i> )                          |
| Exon Composition    | 7-10                                                           |
| Genomic Length (nt) | 17902                                                          |
| Spliced Length (nt) | 474                                                            |
| Primer Sequence     | F: 5'-GGAAATCAACACCCCTGCCA-3'<br>R: 5'-CGACCATGGAGTGCAAGGAT-3' |
| AT (° C)            | 60                                                             |
| Product Length (bp) | 204                                                            |

AT: annealing temperature.

**Supplementary Table 2. siRNA and overexpressed vector sequences used in this study.**

| <b>Oligo</b>                          | <b>Sequences</b>                                                                               |
|---------------------------------------|------------------------------------------------------------------------------------------------|
| <i>siRNA-circDDX10-1</i>              | Sense: AAAUCAACACCCUGCCACTT<br>Antisense: GUGGCAGGGGUGUUGAUUUTT                                |
| <i>siRNA-circDDX10-2</i>              | Sense: AGGAAAUCAACACCCUGCCTT<br>Antisense: GCAGGGGUGUUGAUUUCCTT                                |
| <i>siRNA-mDDX10</i>                   | Sense: GCUGCAGUACUCUUUGCUATT<br>Antisense: UAGCAAAGAGUACUGCAGCTT                               |
| <i>siRNA-negative control (FAM)</i>   | Sense: UUCUCCGAACGUGUCACGUTT<br>Antisense: ACGUGACACGUUCGGAGAATT                               |
| <i>siRNA-negative control</i>         | Sense: UUCUCCGAACGUGUCACGUTT<br>Antisense: ACGUGACACGUUCGGAGAATT                               |
| <i>siRNA-positive control (GAPDH)</i> | Sense: UGACCUCAACUACAUGGUUTT<br>Antisense: AACCAUGUAGUUGAGGUCATT                               |
| overexpressed-<br><i>circDDX10</i>    | F: cgGAATTCTAATACTTTTCAGCACCCCTGCCACTTTGGAACAGA<br>R: cgGGATCCAGTTGTTCTTACTTGATTTCCCTTCACAGGTA |

**Supplementary Table 3. Primer sequences for qRT-PCR in this section.**

| Gene           | Gene bank access number | Primer sequences                                       | Product length (bp) | AT (° C) |
|----------------|-------------------------|--------------------------------------------------------|---------------------|----------|
| <i>GAPDH</i>   | /                       | F: GAAGGTGAAGGTCGGAGTC<br>R: GAAGATGGTGATGGGATTTTC     | 226                 | 60       |
| <i>CYP11A1</i> | NM_000781.2             | F: CAGTCATCCTAGCAGTCCCC<br>R: GGGGATCTCATTGAAGGGGC     | 216                 | 60       |
| <i>CYP17A1</i> | NM_000102.3             | F: TGAGTTTGTGTGGACAAGG<br>R: GGATTCAAGAAACGCTCAGG      | 114                 | 60       |
| <i>CYP19A1</i> | DQ118405.1              | F: ATGAAAGCTCTGTCAGGCC<br>R: TCAACACGTCCACATAGCCC      | 121                 | 60       |
| <i>HSD17B1</i> | NM_000413.3             | F: ATGACGTTTATTGCGCCAGC<br>R: GGTGTTGACTCACTGGACCC     | 95                  | 60       |
| <i>StAR</i>    | /                       | F: GGGATGAGGCTCTTGGATT<br>R: CCCATATCAGCCACTAGCAT      | 150                 | 60       |
| <i>BCL-2</i>   | /                       | F: GTGGAGGAGCTCTTCAGGGA<br>R: AGGCACCCAGGGTGATGCAA     | 304                 | 60       |
| <i>BAX</i>     | /                       | F: CAGGATGCGTCCACCAAGAA<br>R: GCTCCCGGAGGAAGTCCAAT     | 286                 | 60       |
| <i>CASP3</i>   | NM_004346               | F: CATGGAAGCGAATCAATGGACT<br>R: CTGTACCAGACCGAGATGTCA  | 139                 | 60       |
| <i>CASP9</i>   | NM_032996               | F: CTCAGACCAGAGATTCGCAAAC<br>R: GCATTTCCCTCAAACCTCTCAA | 116                 | 60       |

AT: annealing temperature. \*, divergent primers.
